# Supplementary material for: Companion Animals—An Overlooked and Misdiagnosed Reservoir of Carbapenem Resistance
Source: MDPI journal article supplement (doi:10.3390/antibiotics11040533), 2022-04-17
Supplement: s1 [file s1]

# Companion Animals—An Overlooked and Misdiagnosed Reservoir of Carbapenem Resistance

Joana Moreira da Silva <sup>1,2,†,‡</sup>, Juliana Menezes <sup>1,2,†,‡</sup>, Cátia Marques <sup>1,2,3,†</sup> and Constança Ferreira Pomba <sup>1,2,4,\*,†</sup>

<sup>1</sup> Centre for Interdisciplinary Research in Animal Health (CIISA), Faculty of Veterinary Medicine, University of Lisbon, 1300-477 Lisbon, Portugal; jmsilva@fmv.ulisboa.pt (J.M.d.S.); julianamenezes@fmv.ulisboa.pt (J.M.); catia.marques@ulusofona.pt (C.M.)

<sup>2</sup> Associate Laboratory for Animal and Veterinary Sciences (AL4AnimalS), 1300-477 Lisbon, Portugal

<sup>3</sup> Faculty of Veterinary Medicine, Lusófona University, 1749-024 Lisbon, Portugal

<sup>4</sup> Molecular Veterinary Diagnostic Laboratory-Genevet, 2790-140 Carnaxide, Portugal

\* Correspondence: cpomba@fmv.ulisboa.pt

† Members of ENOVAT—European Network for Optimization of Veterinary Antimicrobial Treatment (COST ACTION CA18217).

‡ These authors contributed equally to this work.

**Table S1.** Representative MIC values for Imipenem, Meropenem and Ertapenem from companion animals Carbapenemase-producing isolates

| Carbapenemase | Year | Country       | Host          | Source                | Bacterial Species                   | Minimum Inhibitory Concentration (mg/L) |     |     | Ref. |
|---------------|------|---------------|---------------|-----------------------|-------------------------------------|-----------------------------------------|-----|-----|------|
|               |      |               |               |                       |                                     | IMP                                     | MEM | ETP |      |
| KPC-2         | 2018 | Brazil        | Dog           | Infection (UTI)       | <i>Escherichia coli</i>             | 4                                       | 4   | 4   | [9]  |
| KPC-2         | 2021 | Brazil        | Dog           | Infection (UTI)       | <i>Klebsiella pneumoniae</i>        | >32                                     | >32 | NA  | [10] |
| KPC-4         | 2018 | USA           | Dog           | Infection (UTI, SSTI) | <i>Enterobacter xiangfangensis</i>  | ≤1                                      | 2   | NA  | [11] |
| KPC-4         | 2018 | USA           | Dog           | Infection (UTI, SSTI) | <i>Enterobacter xiangfangensis</i>  | ≤1                                      | 1   | NA  | [11] |
| NDM-1         | 2013 | United States | Dogs and Cats | Infection (SSTI)      | <i>Escherichia coli</i>             | NA                                      | 1   | NA  | [24] |
| NDM-1         | 2013 | United States | Dogs and Cats | Infection (UTI)       | <i>Escherichia coli</i>             | NA                                      | 0.5 | NA  | [24] |
| NDM-1         | 2013 | United States | Dogs and Cats | Infection (UTI)       | <i>Escherichia coli</i>             | NA                                      | 4   | NA  | [24] |
| NDM-1         | 2013 | United States | Dogs and Cats | Infection (UTI)       | <i>Escherichia coli</i>             | NA                                      | 16  | NA  | [24] |
| NDM-1         | 2017 | China         | Dog           | Commensal             | <i>Escherichia coli</i>             | 64                                      | 64  | 256 | [25] |
| NDM-1         | 2017 | China         | Dog           | Comensal              | <i>Escherichia coli</i>             | 32                                      | 64  | NA  | [16] |
| NDM-1         | 2018 | Italy         | Dog           | Comensal              | <i>Acinetobacter radioresistens</i> | >32                                     | >32 | NA  | [23] |
| NDM-5         | 2017 | China         | Dogs          | Comensal              | <i>Escherichia coli</i>             | 32                                      | 32  | NA  | [16] |
| NDM-5         | 2017 | China         | Dogs          | Comensal              | <i>Escherichia coli</i>             | 16                                      | 64  | NA  | [16] |
| NDM-5         | 2017 | China         | Dogs          | Comensal              | <i>Escherichia coli</i>             | 64                                      | 128 | NA  | [16] |
| NDM-5         | 2017 | China         | Dogs          | Comensal              | <i>Escherichia coli</i>             | 8                                       | 32  | NA  | [16] |
| NDM-5         | 2017 | China         | Dogs          | Comensal              | <i>Escherichia coli</i>             | 16                                      | 32  | NA  | [16] |
| NDM-5         | 2017 | China         | Dogs          | Comensal              | <i>Escherichia coli</i>             | 8                                       | 16  | NA  | [16] |

|         |      |                |               |                                                            |                                |      |      |      |      |
|---------|------|----------------|---------------|------------------------------------------------------------|--------------------------------|------|------|------|------|
| NDM-5   | 2018 | United States  | Dog           | Infection (URTI)                                           | <i>Escherichia coli</i>        | 4    | NA   | NA   | [20] |
| NDM-5   | 2019 | South Korea    | Dog           | Commensal                                                  | <i>Escherichia coli</i>        | 4    | 4    | 16   | [21] |
| NDM-5   | 2019 | South Korea    | Cats          | Commensal                                                  | <i>Escherichia coli</i>        | 16   | 32   | >32  | [21] |
| NDM-5   | 2019 | United Kingdom | Dog           | Infection (SSTI)                                           | <i>Escherichia coli</i>        | 4    | 4    | NA   | [19] |
| NDM-5   | 2021 | Italy          | Dog           | Infection (UTI)                                            | <i>Escherichia coli</i>        | >16  | >16  | >2   | [15] |
| NDM-9   | 2017 | China          | Dogs          | Comensal                                                   | <i>Escherichia coli</i>        | 8    | 64   | NA   | [16] |
| OXA-48  | 2017 | France         | Dog           | Commensal                                                  | <i>Escherichia coli</i>        | 1.5  | 0.75 | 0.75 | [30] |
| OXA-181 | 2018 | Switzerland    | Dogs          | Commensal                                                  | <i>Escherichia coli</i>        | 1    | 0.5  | >2   | [26] |
| OXA-181 | 2018 | Switzerland    | Dogs and Cats | Commensal                                                  | <i>Escherichia coli</i>        | 0.5  | 0.5  | >2   | [26] |
| OXA-181 | 2018 | Switzerland    | Dogs and Cats | Commensal                                                  | <i>Escherichia coli</i>        | 0.5  | 0.5  | 2    | [26] |
| OXA-181 | 2018 | Switzerland    | Dogs and Cats | Commensal                                                  | <i>Escherichia coli</i>        | 0.5  | 0.25 | 2    | [26] |
| OXA-181 | 2018 | Switzerland    | Dogs          | Commensal                                                  | <i>Escherichia coli</i>        | 0.5  | 1    | >2   | [26] |
| OXA-181 | 2018 | Switzerland    | Cat           | Commensal                                                  | <i>Escherichia coli</i>        | 0.25 | 0.25 | 2    | [26] |
| OXA-181 | 2020 | Portugal       | Dog           | Commensal                                                  | <i>Escherichia coli</i>        | ≤1   | ≤1   | 1    | [27] |
| OXA-23  | 2014 | Portugal       | Cat           | Infection (UTI)                                            | <i>Acinetobacter baumannii</i> | >8   | >8   | NA   | [33] |
| OXA-23  | 2017 | Germany        | Dogs and Cats | Infection (UTI, SSTI, URTI, CRBSI, suppurate inflammation) | <i>Acinetobacter baumannii</i> | >16  | NA   | NA   | [34] |
| OXA-23  | 2018 | Italy          | Dogs and Cats | Comensal                                                   | <i>Acinetobacter baumannii</i> | >32  | >32  | NA   | [23] |
| OXA-23  | 2018 | Italy          | Dogs and Cats | Comensal                                                   | <i>Acinetobacter baumannii</i> | 13   | >32  | NA   | [23] |
| OXA-23  | 2014 | Portugal       | Cat           | Infection (UTI)                                            | <i>Acinetobacter baumannii</i> | >8   | >8   | NA   | [33] |
| VIM-1   | 2016 | Spain          | Dog           | Commensal                                                  | <i>Klebsiella pneumoniae</i>   | 4    | 4    | ≤2   | [14] |

ETP, Ertapenem; IMP, Imipenem; MEM, Meropenem; NA, not applicable.
